# Supplementary material for: The halogen substitution strategy of inorganic skeletons triggers dielectric and band gap regulation of hybrid perovskites
Source: Royal Society of Chemistry journal article supplement (doi:10.1039/d3dt02924g), 2023-01-01
Supplement: d3dt02924g1.pdf [file d3dt02924g1.pdf]

## Electronic Supplementary Information

### The halogen substitution strategy of inorganic skeletons triggers dielectric and band gap regulation of hybrid perovskites

Xiao-Tong Sun,<sup>a</sup> Ying-Yu Zhang,<sup>b</sup> Yan Han,<sup>b</sup> Xiao-Ping Wang,<sup>b</sup> Jie Li,<sup>a</sup> Jun-Yi Li,<sup>a</sup> Hao-Fei Ni,<sup>b</sup> Da-Wei Fu,<sup>\*a,b</sup> Zhi-Xu Zhang,<sup>\*b</sup>

<sup>a</sup>Ordered Matter Science Research Center, Jiangsu Key Laboratory for Science and Applications of Molecular Ferroelectrics, Southeast University, Nanjing 211189, People's Republic of China. (E-mail: dawei@seu.edu.cn)

<sup>b</sup>Institute for Science and Applications of Molecular Ferroelectrics, Key Laboratory of the Ministry of Education for Advanced Catalysis Materials, Zhejiang Normal University, Jinhua, 321004, People's Republic of China. (E-mail: zhangzhixu@zjnu.edu.cn)

#### Physical Measurements

##### Single-Crystal X-ray Crystallography

Single-crystal X-ray diffraction data of compound **1** were collected using Mo K $\alpha$  radiation ( $\lambda=0.71073$  Å) at 213 and 298 K, on a Rigaku Saturn 924 diffractometer in  $\omega$  scan mode. The data of compound **2** at 298 and 233 K were also collected. The room and low-temperature structures of the crystal data were shown in supporting (Table S1 and S2).

Cambridge Crystallographic Data Center (CCDC) (deposition numbers: 2272301-2272304) and can be obtained free of charge from the CCDC via [www.ccdc.cam.ac.uk/getstructures](http://www.ccdc.cam.ac.uk/getstructures).

##### IR Studies

The dried samples and dried KBr were fully mixed in an agate mortar at a ratio of 1:100, and ground into powder. The powder was pressed into translucent, uniform, and non-cracked round slices, which were placed in the sample test rack of the infrared spectrometer for testing and data collection (Figure S4).

##### Thermal analysis

To study the effect of halogen substitution on the phase transition behavior, differential

scanning calorimetry (DSC) was performed to facilitate the detection of phase transitions. Take approximately 10 mg of the sample and place it in an aluminum crucible, flattening the crucible. Place it in the instrument, and the measurement was performed under the atmosphere of nitrogen. The heating and cooling rate was 20 K/min. Finally, the data were collected and processed.

### **Dielectric properties**

The crystal was ground into powder, pressed into a sheet, and fixed on the electrode with silver glue and 0.02 mm copper wire to measure the dielectric. The temperature of the measured dielectric would not exceed its melting point. The complex dielectric constant  $\epsilon$  is measured by the TH2828A instrument.

### **Ultraviolet-visible diffuse reflectance spectra**

The UV absorption spectra of powder samples **1** and **2** were measured at room temperature using a Shimadzu UV-2600 Spectrophotometer. First, prepare a standard whiteboard. An appropriate amount of anhydrous BaSO<sub>4</sub> powder was added to the sample tank, and then the powder was compacted with a glass column so that the anhydrous BaSO<sub>4</sub> powder was pressed into a flat surface and filled the entire sample tank completely. (In order to facilitate the cleaning of the glass cylinder, the surface of anhydrous BaSO<sub>4</sub> powder was generally covered with a piece of weighing paper and then pressed with the glass cylinder, so that the glass cylinder does not come into direct contact with the sample.) For the standard UV measurements, BaSO<sub>4</sub> as a blank reference is required. It should be that anhydrous BaSO<sub>4</sub> standard whiteboard to test the background baseline. Anhydrous BaSO<sub>4</sub> is a chemical commonly used in solid UV testing. Anhydrous BaSO<sub>4</sub> has good UV reflective properties, especially in the 200-400 m wavelength range. This is because anhydrous BaSO<sub>4</sub> has good optical properties to reflect or transmit UV light. Therefore, anhydrous BaSO<sub>4</sub> coatings are widely used in UV testing. Then, a standard whiteboard was used to test the background baseline: the pressed standard whiteboard was put into the sample slot position, and it was used as the background test baseline. After the baseline was measured, a small amount of powder of compound **1** was added to the substrate of a standard white plate and the sample was again flattened with a glass cylinder to obtain a sample plate. Finally, the

sample plate was placed into the sample slot for testing. After testing a sample, the standard white plate was re-prepared and then the sample plate was pressed on top of the standard white plate to continue the test.

### Hirshfeld surfaces and two-dimensional fingerprint plots analysis

Hirshfeld surfaces and 2D fingerprint plots are calculated by entering CIF structure files into the CrystalExplorer software. Hirshfeld surfaces of two compounds were obtained using a standard (high) surface resolution, which can provide information about intermolecular interactions in the crystal. The 2D fingerprint plot is a combination of  $d_e$  and  $d_i$  that summarizes intermolecular contacts in the crystal and complements the Hirshfeld surfaces. The normalized contact distance  $d_{\text{norm}}$  is calculated according to:

$$d_{\text{norm}} = \frac{d_i - r_i^{\text{vdW}}}{r_i^{\text{vdW}}} + \frac{d_e - r_e}{r_e^{\text{vdW}}}$$

$d_{\text{norm}}$  surface is used for the identification of close intermolecular interactions. The normalized contact distance  $d_{\text{norm}}$  is based on  $d_e$ ,  $d_i$ , and the van der Waals (vdW) radii of the two atoms external ( $r_e^{\text{vdW}}$ ) and internal ( $r_i^{\text{vdW}}$ ) to the surface. The value of  $d_{\text{norm}}$  is negative or positive when intermolecular contacts are shorter or longer than, respectively. Hirshfeld surface with  $d_{\text{norm}}$  values display a red-blue-white color scheme: where red regions correspond to closer contacts and negative  $d_{\text{norm}}$  value; the blue regions correspond to longer contacts and positive  $d_{\text{norm}}$  value; and the white regions correspond to the distance of contacts are exactly the van der Waals separation and with a  $d_{\text{norm}}$  value of zero.

**Table S1** Crystallographic data and structural refinement details of compound **1**.

| Compound              | <b>LTP<sub>1</sub></b>                             | <b>RTP<sub>1</sub></b>                             |
|-----------------------|----------------------------------------------------|----------------------------------------------------|
| Empirical formula     | [C <sub>7</sub> H <sub>16</sub> N]PbI <sub>3</sub> | [C <sub>7</sub> H <sub>16</sub> N]PbI <sub>3</sub> |
| Formula weight        | 702.10                                             | 702.10                                             |
| Temperature/K         | 213 K                                              | 298 K                                              |
| Crystal system        | monoclinic                                         | monoclinic                                         |
| Space group           | <i>P</i> 2 <sub>1</sub> / <i>c</i>                 | <i>P</i> 2 <sub>1</sub> / <i>c</i>                 |
| <i>a</i> /Å           | 11.9805(9)                                         | 11.554(3)                                          |
| <i>b</i> /Å           | 16.4269(12)                                        | 17.566(4)                                          |
| <i>c</i> /Å           | 7.8664(4)                                          | 7.9189(16)                                         |
| $\beta$ /°            | 102.060(3)                                         | 101.329(5)                                         |
| Volume/Å <sup>3</sup> | 1513.96(18)                                        | 1575.9(6)                                          |

|                           |        |        |
|---------------------------|--------|--------|
| $\mu/\text{mm}^{-1}$      | 21.206 | 16.547 |
| <i>Z</i>                  | 4      | 4      |
| GOF                       | 1.062  | 1.042  |
| $R_1[I \geq 2\sigma(I)]$  | 0.0529 | 0.0482 |
| $wR_2[I \geq 2\sigma(I)]$ | 0.1082 | 0.1003 |

**Table S2** Crystallographic data and structural refinement details of compound **2**.

| Compound                  | LTP <sub>2</sub>                                    | RTP <sub>2</sub>                                    |
|---------------------------|-----------------------------------------------------|-----------------------------------------------------|
| Empirical formula         | [C <sub>7</sub> H <sub>16</sub> N]PbBr <sub>3</sub> | [C <sub>7</sub> H <sub>16</sub> N]PbBr <sub>3</sub> |
| Formula weight            | 561.13                                              | 561.13                                              |
| Temperature/K             | 233 K                                               | 298 K                                               |
| Crystal system            | Orthorhombic                                        | Orthorhombic                                        |
| Space group               | <i>Pbca</i>                                         | <i>Pbca</i>                                         |
| <i>a</i> /Å               | 15.8846(8)                                          | 17.0361(8)                                          |
| <i>b</i> /Å               | 7.6949(3)                                           | 7.6699(3)                                           |
| <i>c</i> /Å               | 22.2250(10)                                         | 21.3038(12)                                         |
| $\beta/^\circ$            | 90                                                  | 90                                                  |
| Volume/Å <sup>3</sup>     | 2716.6(2)                                           | 2783.7(2)                                           |
| $\mu/\text{mm}^{-1}$      | 21.206                                              | 20.692                                              |
| <i>Z</i>                  | 8                                                   | 8                                                   |
| GOF                       | 1.076                                               | 1.068                                               |
| $R_1[I \geq 2\sigma(I)]$  | 0.0498                                              | 0.0805                                              |
| $wR_2[I \geq 2\sigma(I)]$ | 0.1021                                              | 0.1858                                              |

**Table S3.** Bond lengths (Å) for **1** at 213 K

| Bond lengths (Å) for <b>1</b> at 213 K |            |       |            | Table<br>S4.<br>Bond<br>d<br>angles (°)<br>for |
|----------------------------------------|------------|-------|------------|------------------------------------------------|
| Pb1—I1                                 | 3.1885 (8) | N1—C1 | 1.495 (15) |                                                |
| Pb1—I1 <sup>i</sup>                    | 3.2037 (8) | N1—C2 | 1.528 (15) |                                                |
| Pb1—I2 <sup>i</sup>                    | 3.2603 (8) | N1—C3 | 1.491 (16) |                                                |
| Pb1—I2                                 | 3.2539 (8) | C4—C5 | 1.496 (17) |                                                |
| Pb1—I3                                 | 3.1887 (8) | C5—C7 | 1.52 (2)   |                                                |
| Pb1—I3 <sup>ii</sup>                   | 3.2637 (8) | C5—C6 | 1.526 (17) |                                                |
| N1—C4                                  | 1.528 (13) | C7—C6 | 1.51 (3)   |                                                |

**1** at 213 K

| Bond angles (°) for <b>1</b> at 213 K |            |                          |             |
|---------------------------------------|------------|--------------------------|-------------|
| I1—Pb1—I1 <sup>i</sup>                | 90.96 (2)  | Pb1—I1—Pb1 <sup>ii</sup> | 75.949 (17) |
| I1 <sup>i</sup> —Pb1—I2               | 177.30 (2) | Pb1—I2—Pb1 <sup>ii</sup> | 74.283 (17) |
| I1—Pb1—I2 <sup>i</sup>                | 177.96 (2) | Pb1—I3—Pb1 <sup>i</sup>  | 75.107 (17) |
| I1—Pb1—I2                             | 88.43 (2)  | C1—N1—C4                 | 106.9 (10)  |
| I1 <sup>i</sup> —Pb1—I2 <sup>i</sup>  | 88.06 (2)  | C1—N1—C2                 | 107.8 (9)   |
| I1—Pb1—I3                             | 94.16 (2)  | C1—N1—C3                 | 110.5 (11)  |
| I1 <sup>i</sup> —Pb1—I3 <sup>ii</sup> | 96.17 (2)  | C2—N1—C4                 | 110.7 (9)   |

|                                       |            |          |            |
|---------------------------------------|------------|----------|------------|
| I1—Pb1—I3 <sup>ii</sup>               | 84.41 (2)  | C3—N1—C4 | 110.4 (9)  |
| I2—Pb1—I2 <sup>i</sup>                | 92.64 (2)  | C3—N1—C2 | 110.4 (11) |
| I2—Pb1—I3 <sup>ii</sup>               | 86.40 (2)  | C5—C4—N1 | 113.5 (9)  |
| I2 <sup>i</sup> —Pb1—I3 <sup>ii</sup> | 93.93 (2)  | C4—C5—C7 | 119.3 (11) |
| I3—Pb1—I1 <sup>i</sup>                | 85.39 (2)  | C4—C5—C6 | 114.0 (11) |
| I3—Pb1—I2 <sup>i</sup>                | 87.54 (2)  | C7—C5—C6 | 59.4 (11)  |
| I3—Pb1—I2                             | 92.03 (2)  | C6—C7—C5 | 60.7 (10)  |
| I3—Pb1—I3 <sup>ii</sup>               | 177.89 (2) | C7—C6—C5 | 60.0 (10)  |

Symmetry codes: (i)  $x, -y+3/2, z+1/2$ ; (ii)  $x, -y+3/2, z-1/2$ .

**Table S5.** Bond lengths (Å) for **1** at 298 K

| Bond lengths (Å) for <b>1</b> at 298 K |             |         |            |
|----------------------------------------|-------------|---------|------------|
| Pb3—I9                                 | 3.2540 (10) | N1—C7   | 1.479 (9)  |
| Pb3—I9 <sup>i</sup>                    | 3.2761 (10) | N1—C4   | 1.509 (19) |
| Pb3—I8                                 | 3.2006 (10) | N1—C2   | 1.510 (19) |
| Pb3—I8 <sup>i</sup>                    | 3.2284 (10) | N1—C5   | 1.515 (19) |
| Pb3—I7 <sup>ii</sup>                   | 3.2366 (10) | C8—C9   | 1.503 (10) |
| Pb3—I7                                 | 3.2276 (10) | C11—C10 | 1.495 (10) |
| N1—C8                                  | 1.473 (10)  | C11—C9  | 1.497 (9)  |
| N1—C3                                  | 1.512 (16)  | C10—C9  | 1.498 (10) |
| N1—C1                                  | 1.516 (16)  | C9—C7   | 1.490 (10) |
| N1—C6                                  | 1.506 (17)  |         |            |

**Table S6.** Bond angles (°) for **1** at 298 K

| Bond angles (°) for <b>1</b> at 298 K |            |            |            |
|---------------------------------------|------------|------------|------------|
| I3—Pb1—I3 <sup>i</sup>                | 93.66 (3)  | C4B—N1—C3A | 71 (3)     |
| I2 <sup>i</sup> —Pb1—I3 <sup>i</sup>  | 85.63 (3)  | C2A—N1—C1A | 101.1 (16) |
| I2—Pb1—I3                             | 86.45 (3)  | C3A—N1—C2A | 116.8 (18) |
| I2 <sup>i</sup> —Pb1—I3               | 178.81 (2) | C3A—N1—C1A | 106.9 (18) |
| I2—Pb1—I3 <sup>i</sup>                | 179.59 (3) | C4A—N1—C2B | 152 (4)    |
| I2—Pb1—I2 <sup>i</sup>                | 94.28 (3)  | C4A—N1—C1B | 85 (3)     |
| I2—Pb1—I1                             | 92.82 (3)  | C4A—N1—C3B | 117 (4)    |
| I2 <sup>i</sup> —Pb1—I1 <sup>ii</sup> | 93.20 (3)  | C2B—N1—C1B | 121 (5)    |
| I2—Pb1—I1 <sup>ii</sup>               | 85.93 (3)  | C2B—N1—C3B | 37 (4)     |
| I1 <sup>ii</sup> —Pb1—I3              | 87.79 (3)  | C1B—N1—C3B | 137 (5)    |
| I1—Pb1—I3 <sup>i</sup>                | 87.57 (3)  | N1—C4B—C5  | 113.0 (14) |
| I1—Pb1—I3                             | 93.40 (3)  | C6—C7—C5   | 60.1 (5)   |
| I1 <sup>ii</sup> —Pb1—I3 <sup>i</sup> | 93.68 (3)  | C7—C6—C5   | 60.0 (5)   |
| I1—Pb1—I2 <sup>i</sup>                | 85.62 (3)  | C7—C5—C4B  | 94.5 (18)  |
| I1—Pb1—I1 <sup>ii</sup>               | 178.22 (4) | C7—C5—C6   | 59.9 (5)   |
| Pb1—I3—Pb1 <sup>ii</sup>              | 74.65 (2)  | C6—C5—C4B  | 125 (3)    |
| Pb1—I2—Pb1 <sup>ii</sup>              | 76.03 (2)  | C4A—C5—C7  | 129.7 (19) |
| Pb1—I1—Pb1 <sup>i</sup>               | 75.54 (2)  | C4A—C5—C6  | 115.6 (15) |

|            |            |           |            |
|------------|------------|-----------|------------|
| C4B—N1—C2A | 131.7 (18) | N1—C4A—C5 | 113.4 (13) |
| C4B—N1—C1A | 123 (3)    |           |            |

Symmetry codes: (i)  $x, -y+3/2, z+1/2$ ; (ii)  $x, -y+3/2, z-1/2$ .

**Table S7.** Bond lengths (Å) for **2** at 233 K

| Bond lengths (Å) for <b>2</b> at 233 K |             |       |            |
|----------------------------------------|-------------|-------|------------|
| Pb1—Br1                                | 2.9673 (9)  | N1—C4 | 1.524 (13) |
| Pb1—Br1 <sup>i</sup>                   | 3.0627 (10) | N1—C1 | 1.461 (14) |
| Pb1—Br2 <sup>ii</sup>                  | 3.1830 (11) | N1—C2 | 1.518 (14) |
| Pb1—Br2                                | 2.9173 (11) | C5—C4 | 1.519 (14) |
| Pb1—Br3                                | 3.0277 (10) | C5—C6 | 1.518 (15) |
| Pb1—Br3 <sup>i</sup>                   | 3.0949 (10) | C5—C7 | 1.525 (14) |
| N1—C3                                  | 1.513 (13)  | C6—C7 | 1.529 (18) |

**Table S8.** Bond angles (°) for **2** at 233 K

| Bond angles (°) for <b>2</b> at 233 K   |            |                           |            |
|-----------------------------------------|------------|---------------------------|------------|
| Br1—Pb1—Br1 <sup>i</sup>                | 92.83 (3)  | Pb1—Br1—Pb1 <sup>ii</sup> | 79.28 (2)  |
| Br1 <sup>i</sup> —Pb1—Br2 <sup>ii</sup> | 101.16 (3) | Pb1—Br2—Pb1 <sup>i</sup>  | 78.07 (2)  |
| Br1—Pb1—Br2 <sup>ii</sup>               | 80.99 (3)  | Pb1—Br3—Pb1 <sup>ii</sup> | 77.86 (2)  |
| Br1 <sup>i</sup> —Pb1—Br3 <sup>i</sup>  | 85.29 (3)  | C3—N1—C4                  | 110.0 (8)  |
| Br1—Pb1—Br3 <sup>i</sup>                | 178.10 (3) | C1—N1—C3                  | 109.2 (10) |
| Br1—Pb1—Br3                             | 88.18 (3)  | C1—N1—C4                  | 112.2 (8)  |
| Br2—Pb1—Br1                             | 94.72 (3)  | C1—N1—C2                  | 110.7 (10) |
| Br2—Pb1—Br1 <sup>i</sup>                | 83.85 (3)  | C2—N1—C3                  | 107.4 (8)  |
| Br2—Pb1—Br2 <sup>ii</sup>               | 173.50 (3) | C2—N1—C4                  | 107.3 (9)  |
| Br2—Pb1—Br3                             | 92.99 (3)  | C4—C5—C7                  | 114.4 (9)  |
| Br2—Pb1—Br3 <sup>i</sup>                | 85.36 (3)  | C6—C5—C4                  | 118.9 (9)  |
| Br3—Pb1—Br1 <sup>i</sup>                | 176.75 (3) | C6—C5—C7                  | 60.3 (8)   |
| Br3—Pb1—Br2 <sup>ii</sup>               | 82.04 (3)  | C5—C4—N1                  | 112.8 (8)  |
| Br3 <sup>i</sup> —Pb1—Br2 <sup>ii</sup> | 99.10 (3)  | C5—C6—C7                  | 60.1 (8)   |
| Br3—Pb1—Br3 <sup>i</sup>                | 93.71 (3)  | C6—C7—C5                  | 59.6 (7)   |

Symmetry codes: (i)  $-x+1/2, y-1/2, z$ ; (ii)  $-x+1/2, y+1/2, z$ .

**Table S9.** Bond lengths (Å) for **2** at 298 K

| Bond lengths (Å) for <b>2</b> at 298 K |            |         |            |
|----------------------------------------|------------|---------|------------|
| Pb1—Br1                                | 3.002 (2)  | N1—C3A  | 1.537 (17) |
| Pb1—Br1 <sup>i</sup>                   | 3.019 (2)  | N1—C2A  | 1.530 (17) |
| Pb1—Br2 <sup>i</sup>                   | 3.062 (2)  | N1—C4A  | 1.535 (16) |
| Pb1—Br2                                | 3.051 (2)  | C5B—C6B | 1.536 (19) |
| Pb1—Br3                                | 3.015 (2)  | C5B—C7B | 1.535 (19) |
| Pb1—Br3 <sup>ii</sup>                  | 3.045 (2)  | C5B—C4B | 1.533 (19) |
| N1—C2B                                 | 1.537 (18) | C6B—C7B | 1.538 (18) |
| N1—C3B                                 | 1.536 (18) | C4A—C5A | 1.530 (18) |

|        |            |         |            |
|--------|------------|---------|------------|
| N1—C4B | 1.536 (18) | C5A—C6A | 1.536 (19) |
| N1—C1B | 1.535 (18) | C5A—C7A | 1.534 (19) |
| N1—C1A | 1.537 (16) | C6A—C7A | 1.535 (19) |

**Table S10.** Bond angles (°) for **2** at 298 K

| Bond angles (°) for <b>2</b> at 298 K   |             |             |            |
|-----------------------------------------|-------------|-------------|------------|
| Br1—Pb1—Br1 <sup>i</sup>                | 98.35 (8)   | C1B—N1—C2B  | 100 (4)    |
| Br1 <sup>i</sup> —Pb1—Br2               | 177.64 (7)  | C1B—N1—C3B  | 128 (5)    |
| Br1 <sup>i</sup> —Pb1—Br2 <sup>ii</sup> | 83.40 (7)   | C1B—N1—C4B  | 124 (5)    |
| Br1—Pb1—Br2                             | 83.88 (7)   | C3A—N1—C1A  | 105 (4)    |
| Br1—Pb1—Br2 <sup>i</sup>                | 177.76 (7)  | C2A—N1—C1A  | 109.5 (16) |
| Br1 <sup>i</sup> —Pb1—Br3 <sup>ii</sup> | 94.90 (7)   | C2A—N1—C3A  | 97 (3)     |
| Br1—Pb1—Br3 <sup>ii</sup>               | 84.34 (7)   | C2A—N1—C4A  | 125 (3)    |
| Br1—Pb1—Br3                             | 93.90 (7)   | C4A—N1—C1A  | 108.0 (16) |
| Br2—Pb1—Br2 <sup>i</sup>                | 94.38 (8)   | C4A—N1—C3A  | 111.5 (18) |
| Br3—Pb1—Br1 <sup>i</sup>                | 84.55 (6)   | C7B—C5B—C6B | 60.1 (8)   |
| Br3—Pb1—Br2 <sup>i</sup>                | 84.87 (6)   | C4B—C5B—C6B | 119 (6)    |
| Br3 <sup>ii</sup> —Pb1—Br2              | 84.56 (6)   | C4B—C5B—C7B | 107 (5)    |
| Br3—Pb1—Br2                             | 96.07 (7)   | C5B—C6B—C7B | 59.9 (8)   |
| Br3 <sup>ii</sup> —Pb1—Br2 <sup>i</sup> | 96.91 (7)   | C5B—C7B—C6B | 60.0 (8)   |
| Br3—Pb1—Br3 <sup>ii</sup>               | 178.06 (10) | C5B—C4B—N1  | 125 (6)    |
| Pb1—Br1—Pb1 <sup>ii</sup>               | 79.12 (5)   | C5A—C4A—N1  | 103 (3)    |
| Pb1—Br2—Pb1 <sup>ii</sup>               | 77.71 (6)   | C4A—C5A—C6A | 145 (5)    |
| Pb1—Br3—Pb1 <sup>i</sup>                | 78.52 (5)   | C4A—C5A—C7A | 87 (5)     |
| C3B—N1—C2B                              | 104 (4)     | C7A—C5A—C6A | 60.0 (8)   |
| C4B—N1—C2B                              | 72 (5)      | C7A—C6A—C5A | 59.9 (8)   |
| C4B—N1—C3B                              | 108 (5)     | C5A—C7A—C6A | 60.1 (8)   |

Symmetry codes: (i)  $x, -y+3/2, z+1/2$ ; (ii)  $x, -y+3/2, z-1/2$ .

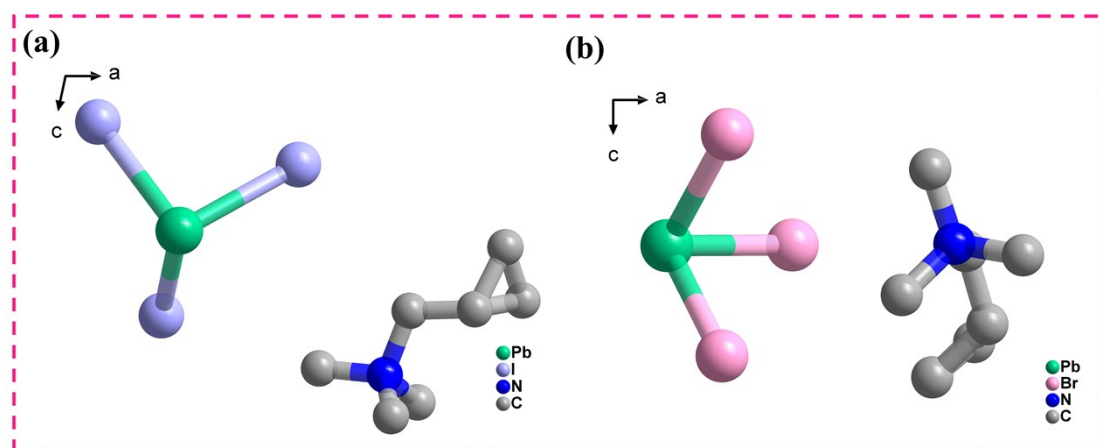

**Fig. S1** Schematic diagram of the least asymmetric unit of compounds **1** and **2** along the b-axis.

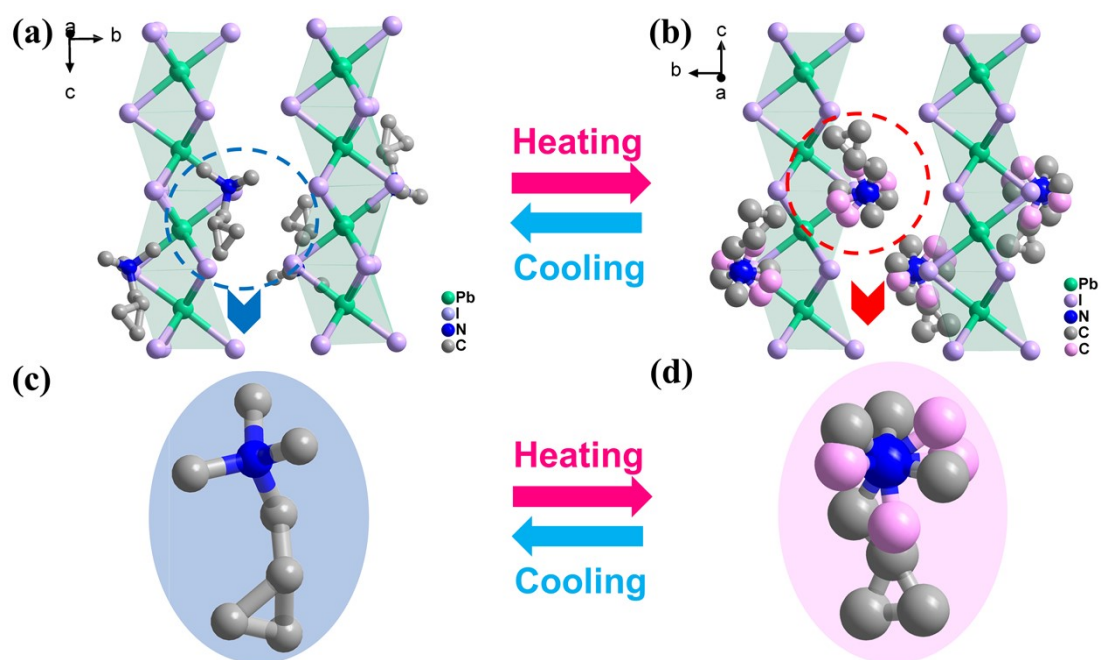

**Fig. S2** Crystal packing diagram of 1-LTP (a) and 1-RTP (b). Ordered state (c) and disordered state (f) of [C<sub>7</sub>H<sub>16</sub>N]<sup>+</sup>.

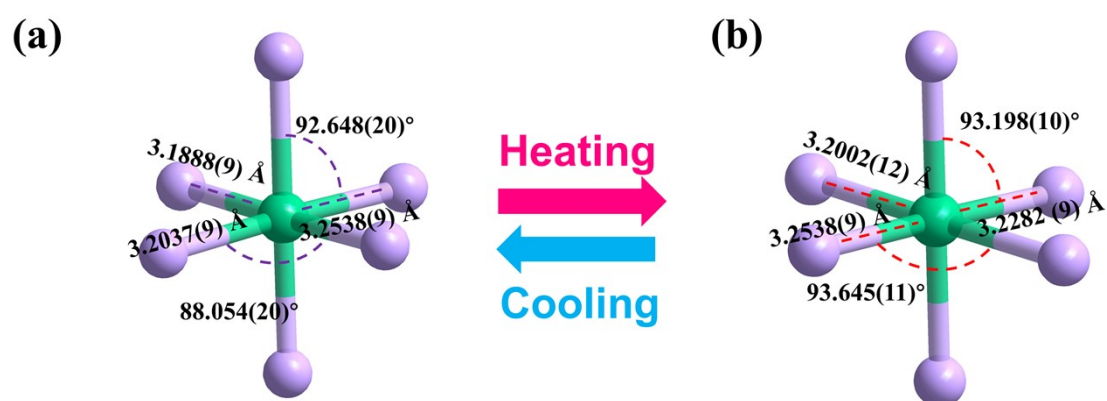

**Fig. S3** Enlarged diagram of the inorganic skeleton in the ordered state (a) and disordered state (b).



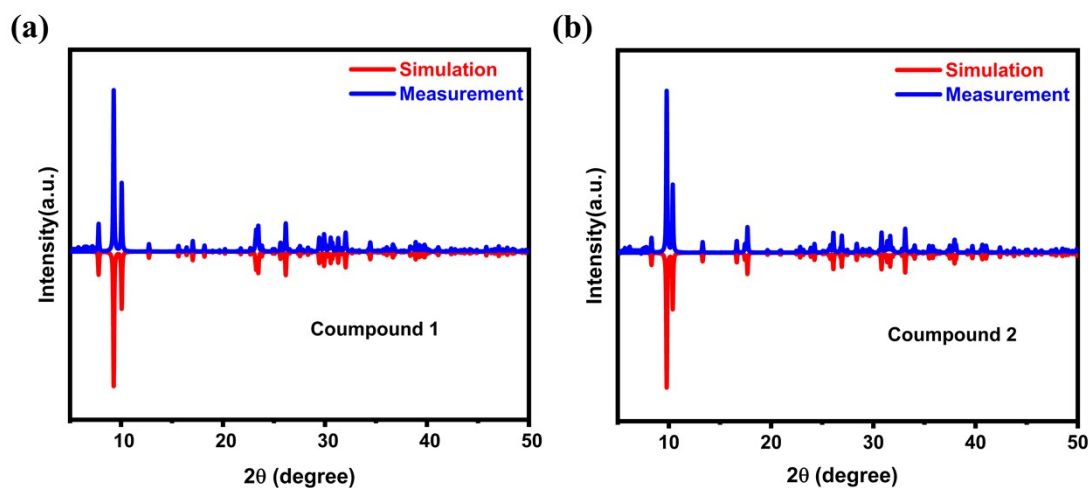

**Fig. S4** Powder X-ray diffraction patterns at 298 K (a) 1 and (b) 2.

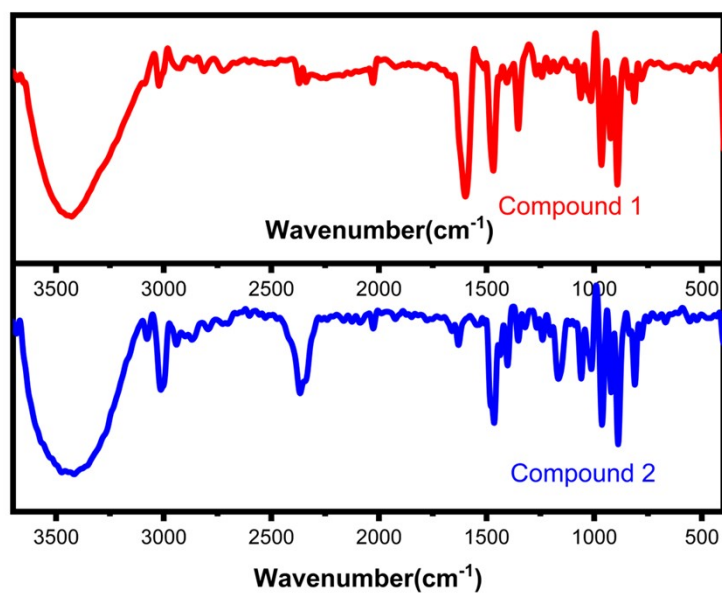

**Fig. S5** The IR spectrum for compound 1 and compound 2 displays the characteristics peaks for stretching and bending vibrations.
